# Supplementary material for: RNA N6-Methyladenosine-Related Gene Contribute to Clinical Prognostic Impact on Patients With Liver Cancer
Source: PubMed Central journal article supplement (PMC7190981; doi:10.3389/fgene.2020.00306), 2020-04-23
Supplement: Data_Sheet_1.pdf [file Data_Sheet_1.pdf]

## Supplementary Material

### Supplementary Figures

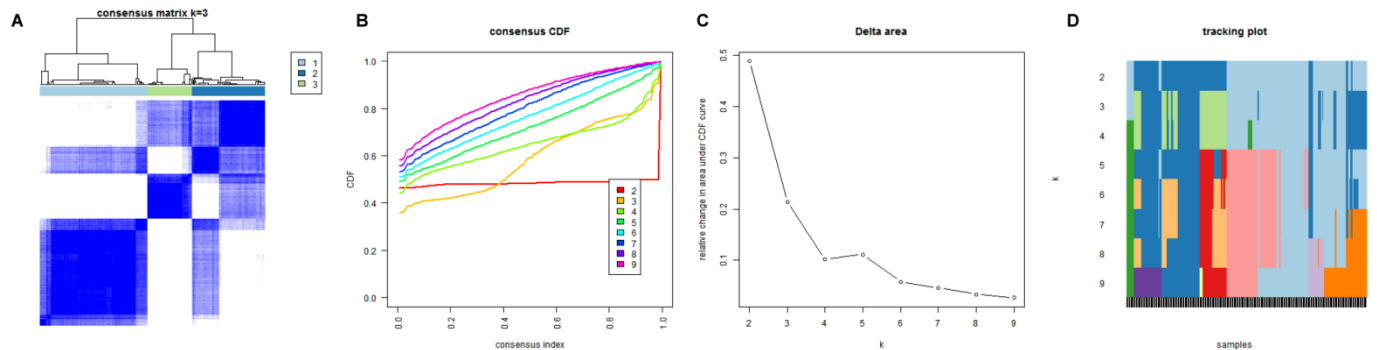

**Figure S1.** Identification of consensus clusters by m6A-related genes. **(A)** Consensus clustering matrix for  $k = 3$ . **(B)** Consensus clustering cumulative distribution function (CDF) for  $k = 2$  to 10. **(C)** Relative change in area under CDF curve for  $k = 2$  to 10. **(D)** The tracking plot for  $k=2$  to  $k=10$ .

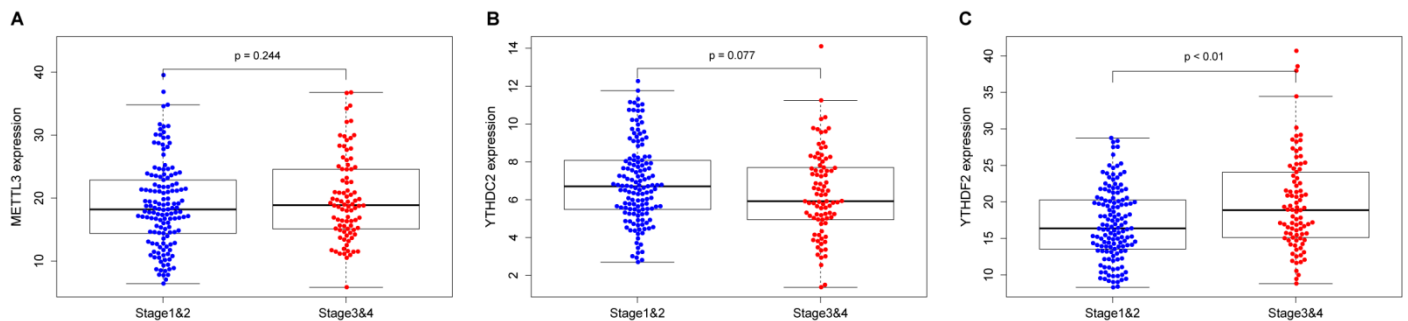

**Figure S2.** Expression levels of **(A)** *METTL3*, **(B)** *YTHDC2* and **(C)** *YTHDF2* in liver cancer patients with different tumor stages.

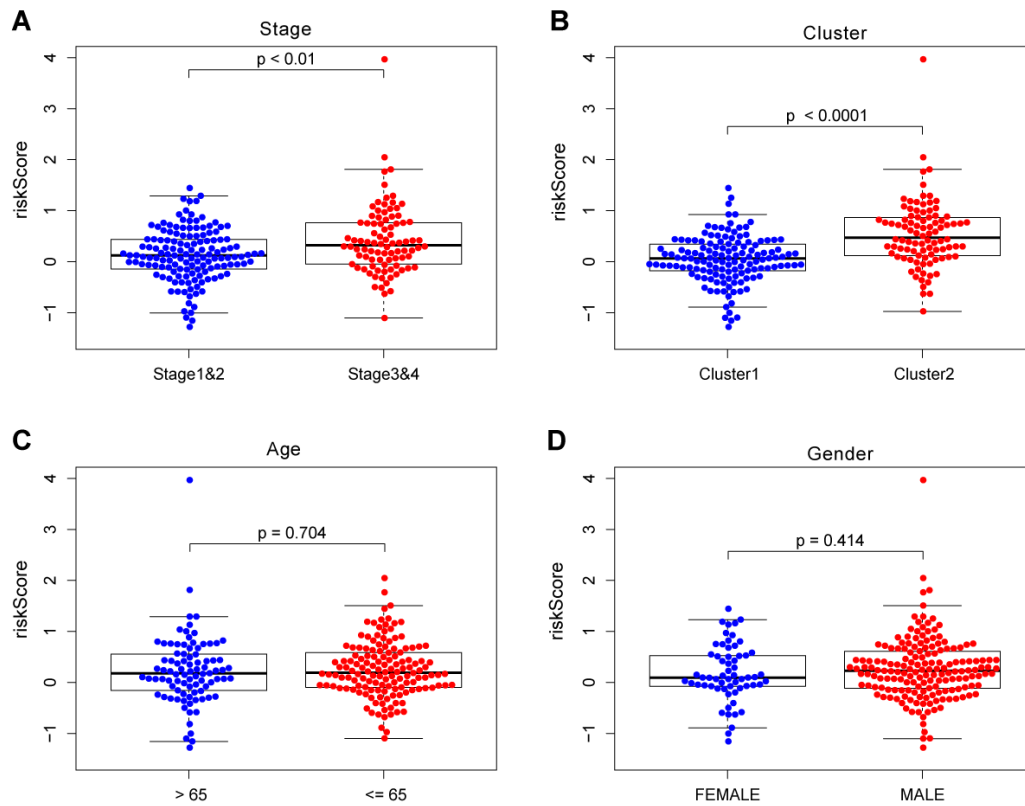

**Figure S3.** Relationship between the riskScore and different clinicopathological factors in the LIRI-JP dataset. (A–D) Distribution of riskScore stratified by (A) tumor stage, (B) cluster, (C) age and (D) gender.

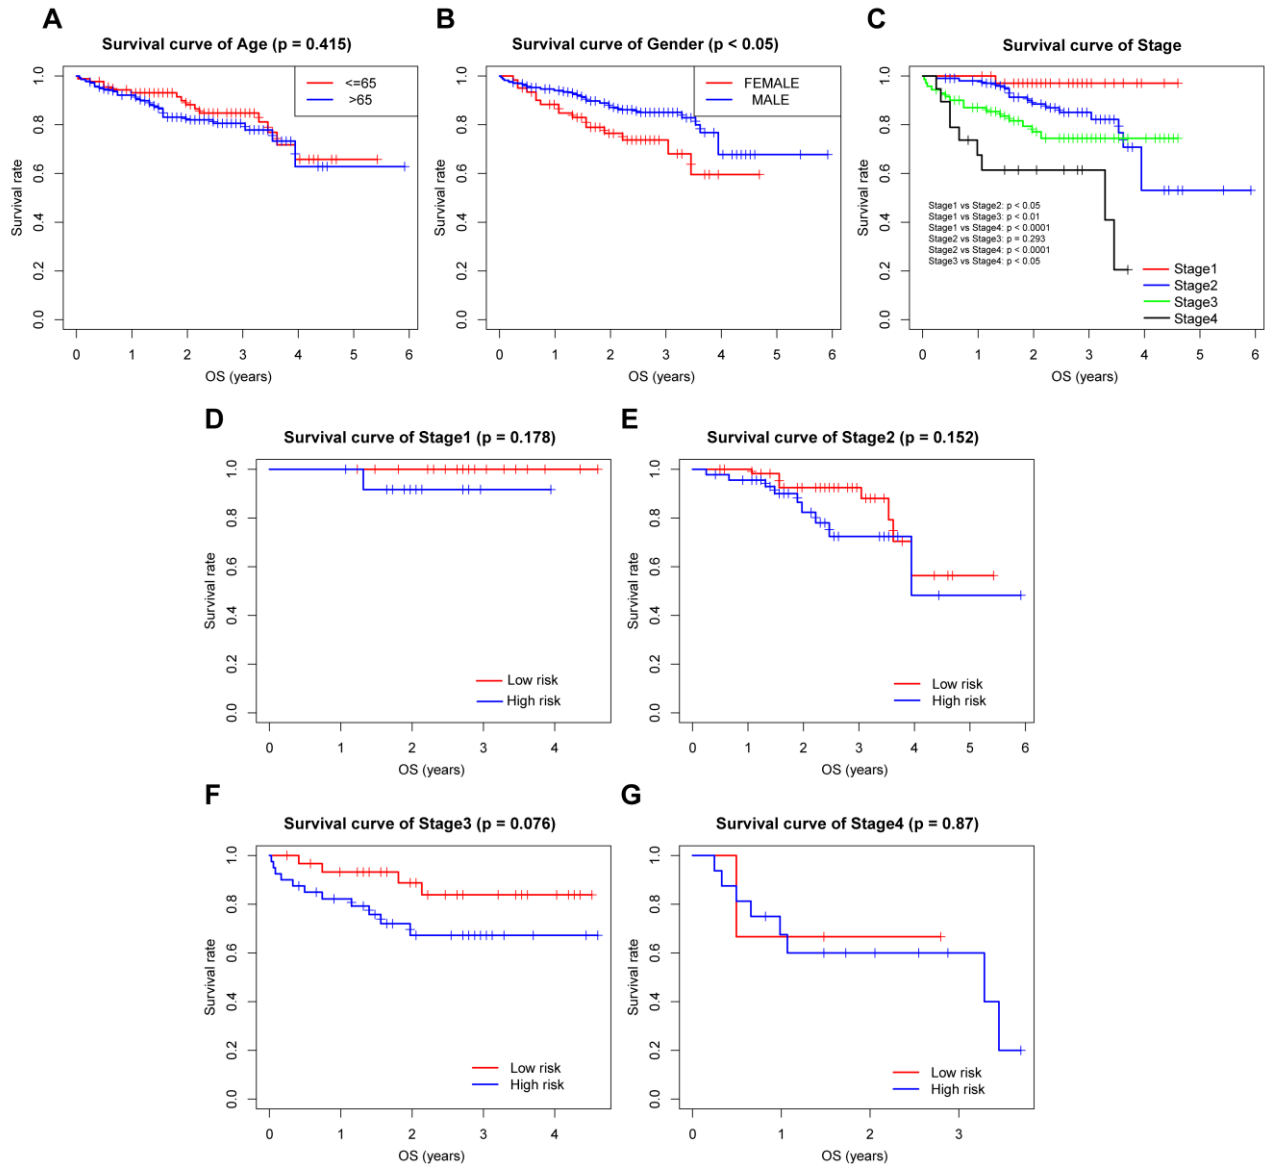

**Figure S4.** Prognostic value of liver cancer patients stratified by the different clinicopathological factors in the LIRI-JP dataset. (A–C) Kaplan-Meier overall survival curves for liver cancer patients with (A) age, (B) gender and (C) tumor stage. (D–G) Kaplan-Meier overall survival curves for different tumor stage with riskScore.

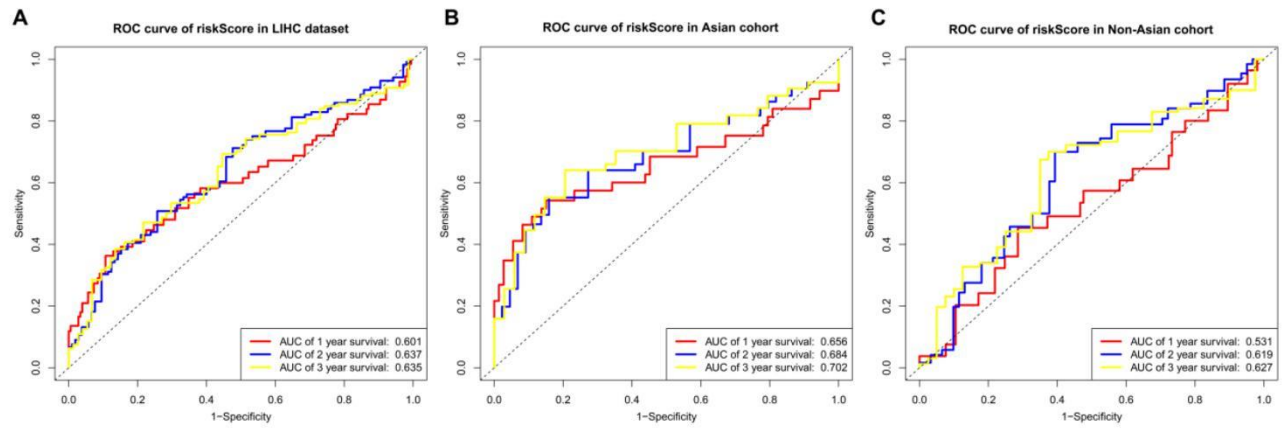

**Figure S5.** Predictive ability of the riskScore for overall survival in TCGA cohort. Overall survival predictive ability of the riskScore in (A) LIHC dataset, (B) Asian cohort and (C) Non-Asian cohort.
